# Supplementary material for: 3-Year effect of weight loss via severe versus moderate energy restriction on body composition among postmenopausal women with obesity - the TEMPO Diet Trial
Source: PubMed Central journal article supplement — Heliyon. 2020 Jun 24;6(6):e04007. doi: 10.1016/j.heliyon.2020.e04007 (PMC7322133; doi:10.1016/j.heliyon.2020.e04007), 2020-06-24
Supplement: mmc1.pdf [file mmc1.pdf]

## **Supplement 1: Avoiding and managing constipation during a meal replacement diet**

### **Symptoms of constipation may include the following**

- Passing stools (faeces) less often than usual
- Hard, dry, lumpy stools that may be painful to pass
- Straining or discomfort when trying to pass a stool
- Having to sit on the toilet for longer than usual
- Bloating of the abdomen and/or abdominal pain

### **Take preventative steps to avoid constipation**

- Make sure you consume two cups of non-starchy vegetables every day
- Drink at least 2 litres of water every day
- Be as physically active as possible
- Be aware of your normal bowel habits and take action as soon as possible if you notice you need to open your bowels less often or you develop constipation
- Speak to your healthcare professional if symptoms persist, if new symptoms develop, or if you have any concerns

### **Interventions for constipation**

If the above preventative steps are not enough to restore normal bowel movements, laxatives may be needed. It is important while on a meal replacement diet to choose a laxative that does not contain added sugar or more than 4 grams of carbohydrate per serving (see examples below).

### **Example laxatives (always check with your healthcare professional before use)**

- Benefiber® Original (based on wheat dextrin, a type of soluble fibre)
- Metamucil® Capsules (based on psyllium husk, a type of soluble fibre)
- Fybogel® (based on ispaghula husk, a type of soluble fibre)
- Movicol® Flavour Free powder (based on macrogol 3350)

### **Remember**

It is important to be proactive about any symptoms experienced while on a meal replacement diet. Discuss any changes with a healthcare professional (eg, a dietitian, your doctor, or a pharmacist).

*3-Year effect of weight loss via severe versus moderate energy restriction on body composition among postmenopausal women with obesity – the TEMPO Diet Trial*  
Radhika V Seimon, Anthony L Wild-Taylor, Sally McClintock, Claudia Harper, Alice A Gibson, Nathan A Johnson, Hamish A Fernando, Tania P Markovic, Jacqueline R Center, Janet Franklin, Peter Y Liu, Stuart M Grieve, Jim Lagopoulos, Ian D Caterson, Nuala M Byrne, Amanda Sainsbury  
Heliyon 4 (2020) e04007 <https://doi.org/10.1016/j.heliyon.2020.e04007>
